# Supplementary material
Source: PubMed Central journal article supplement (PMC187874)

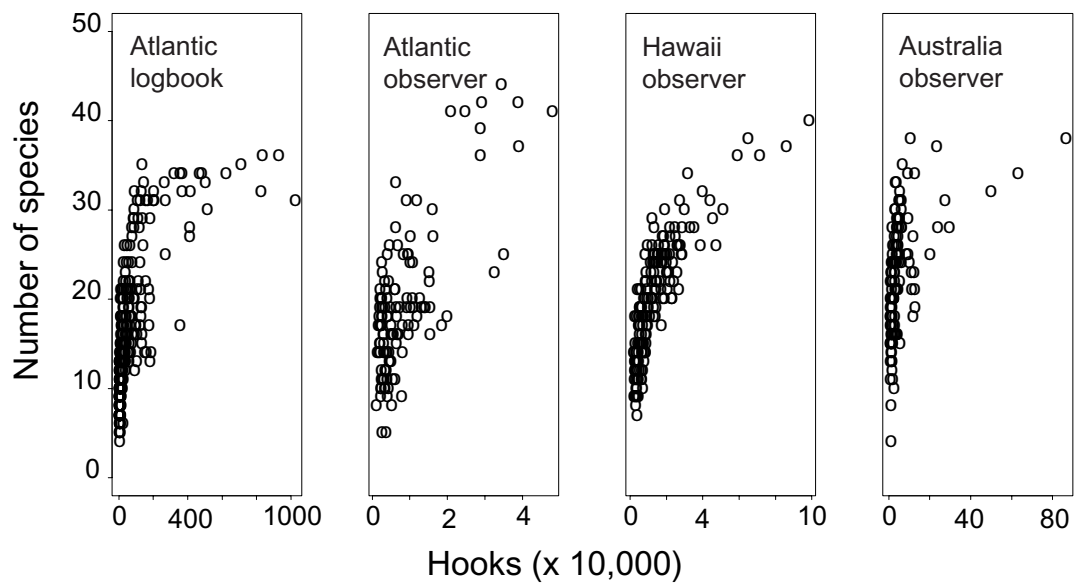

Supplement: pnas_100_17_9884__2.pdf [file pnas_100_17_9884__2.pdf]
